# Supplementary material for: Teratoma Growth Retardation by HDACi Treatment of the Tumor Embryonal Source
Source: PubMed Central journal article supplement (PMC7698704; doi:10.3390/cancers12113416), 2020-11-18

# Supplementary Materials: Teratoma Growth Retardation by HDACi Treatment of the Tumor Embryonal Source

Jure Krasic, Lucija Skara, Monika Ulamec, Ana Katusic Bojanac, Sanja Dabelic, Floriana Bulic-Jakus, Davor Jezek and Nino Sincic

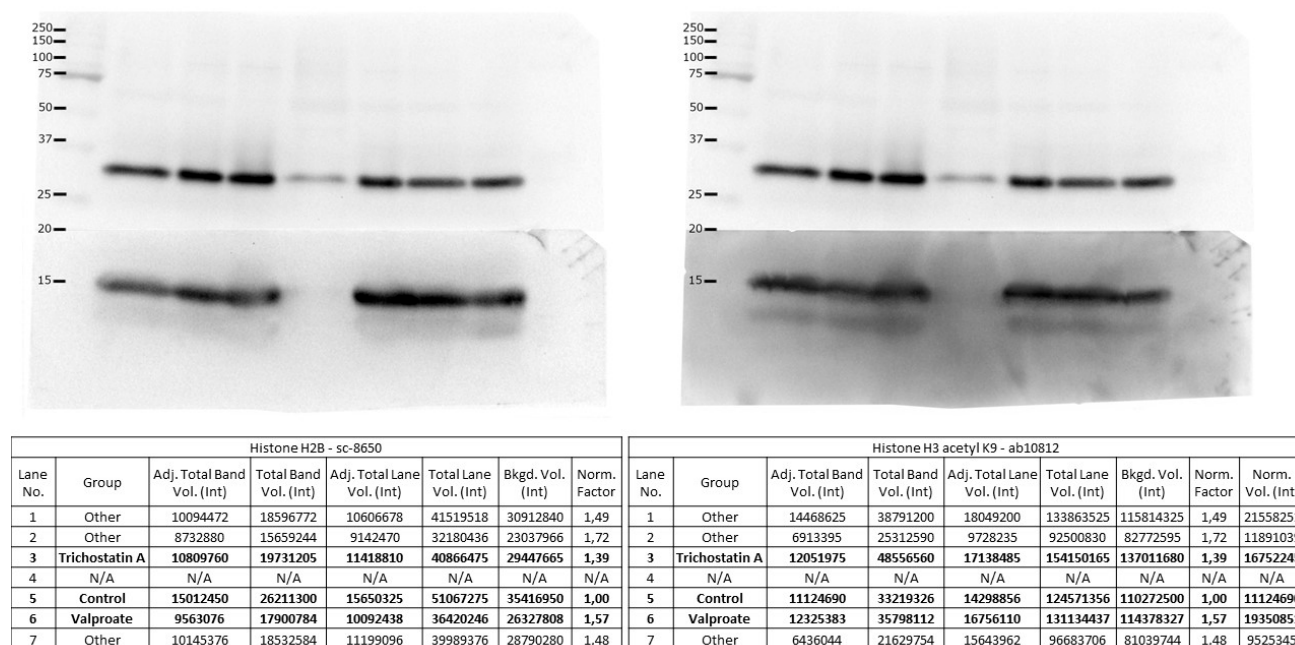

Figure S1. Western blots with densitometry data.

Table S1. Antibodies used in IHC.

| Antibody       | Catalog Number | Manufacturer             | Dilution | HIER               | Secondary                      | Catalog Number | Manufacturer | Dilution     |
|----------------|----------------|--------------------------|----------|--------------------|--------------------------------|----------------|--------------|--------------|
| Anti-Oct4      | NBP2-67748     | Novus Biologics          | 1:150    | pH9 Tris-EDTA      | Goat anti-rabbit IgG           | ab97051        | Abcam        | 1:1000       |
| Anti-Nanog     | ab106465       | Abcam                    | 1:200    | pH9 Tris-EDTA      | Goat anti-rabbit IgG           | ab97051        | Abcam        | 1:1000       |
| Anti-p53       | sc-126         | Santa Cruz Biotechnology | 1:500    | pH6 citrate buffer | REAL EnVision Detection System | K500711        | Dako         | ready to use |
| Anti-Ki-67     | ab15580        | Abcam                    | 1:500    | pH6 citrate buffer | Goat anti-rabbit IgG           | ab97051        | Abcam        | 1:1000       |
| Anti-Caspase-3 | ab13847        | Abcam                    | 1:50     | pH6 citrate buffer | Goat anti-rabbit IgG           | ab97051        | Abcam        | 1:1000       |
| Anti-8-OHdG    | sc-66036       | Santa Cruz Biotechnology | 1:500    | pH6 citrate buffer | REAL EnVision Detection System | K500711        | Dako         | ready to use |

Table S2. Antibodies used in Western blot.

| Antibody.                   | Catalog Number | Manufacturer             | Dilution | Secondary            | Catalog Number | Manufacturer             | Dilution |
|-----------------------------|----------------|--------------------------|----------|----------------------|----------------|--------------------------|----------|
| Anti-Histone H3 (acetyl K9) | ab10812        | Abcam                    | 1:500    | Goat anti-rabbit IgG | ab97051        | Abcam                    | 1:10,000 |
| Anti-Histone H2B            | sc-8650        | Santa Cruz Biotechnology | 1:200    | Donkey anti-goat IgG | sc-2033        | Santa Cruz Biotechnology | 1:20,000 |

Table S3. Primer sequences used in qPCR.

| Gene             |   | Sequence                                | Annealing/Extension Temperature |
|------------------|---|-----------------------------------------|---------------------------------|
| <i>Pou5f1</i>    | F | 5'-AGT TGG CGT GGA GAC TTT GC-3'        | 60 °C                           |
|                  | R | 5'-CAG GGC TTT CAT GTC CTG G-3'         |                                 |
| <i>Nanog</i>     | F | 5'-TTG CTT ACA AGG GTC TGC TAC T-3'     | 60 °C                           |
|                  | R | 5'-ACT GGT AGA AGA ATC AGG GCT-3'       |                                 |
| <i>Sox2</i>      | F | 5'-GCG GAG TGG AAA CTT TTG TCC-3'       | 60 °C                           |
|                  | R | 5'-CGG GAA GCG TGT ACT TAT CCT T-3'     |                                 |
| <i>Eomes</i>     | F | 5'-CCT GGT GGT GTT TTG TTG TG-3'        | 60 °C                           |
|                  | R | 5'-TTT AAT AGC ACC GGG CAC TC-3'        |                                 |
| <i>Nestin</i>    | F | 5'-CCC TGA AGT CGA GGA GCT G-3'         | 60 °C                           |
|                  | R | 5'-CTG CTG CAC CTC TAA GCG A-3'         |                                 |
| <i>Six3</i>      | F | 5'-CCG GAA GAG TTG TCC ATG TTC-3'       | 60 °C                           |
|                  | R | 5'-CGA CTC GTG TTT GTT GAT GGC-3'       |                                 |
| <i>Fgf5</i>      | F | 5'-GCT GTG TCT CAG GGG ATT GT-3'        | 60 °C                           |
|                  | R | 5'-CAC TCT CGG CCT GTC TTT TC-3'        |                                 |
| <i>Myod</i>      | F | 5'-CCA CTC CGG GAC ATA GAC TTG-3'       | 60 °C                           |
|                  | R | 5'-AAA AGC GCA GGT CTG GTG AG-3'        |                                 |
| <i>Brachyury</i> | F | 5'-CTC GGA TTC ACA TCG TGA GAG-3'       | 60 °C                           |
|                  | R | 5'-AAG GCT TTA GCA AAT GGG TTG TA-3'    |                                 |
| <i>Nodal</i>     | F | 5'-CCT GGA GCG CAT TTG GAT G-3'         | 60 °C                           |
|                  | R | 5'-ACT TTT CTG CTC GAC TGG ACA-3'       |                                 |
| <i>Gata4</i>     | F | 5'-CCC TAC CCA GCC TAC ATG G-3'         | 60 °C                           |
|                  | R | 5'-ACA TAT CGA GAT TGG GGT GTC T-3'     |                                 |
| <i>Sox17</i>     | F | 5'-CGA GCC AAA GCG GAG TCT C-3'         | 60 °C                           |
|                  | R | 5'-TGC CAA GGT CAA CGC CTT C-3'         |                                 |
| <i>Cer1</i>      | F | 5'-CTC TGG GGA AGG CAG ACC TAT-3'       | 60 °C                           |
|                  | R | 5'-CCA CAA ACA GAT CCG GCT T-3'         |                                 |
| <i>Rplp0</i>     | F | 5'-TCC AGG CTT TGG GCA TCA-3'           | 60 °C                           |
|                  | R | 5'-CTT TAT CAG CTG CAC ATC ACT CAG A-3' |                                 |

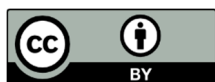

Supplement: cancers-12-03416-s001.pdf [file cancers-12-03416-s001.pdf]
